# Supplementary material for: Low-power STMAS – breaking through the limit of large quadrupolar interactions in high-resolution solid-state NMR spectroscopy
Source: Royal Society of Chemistry journal article supplement (doi:10.1039/d0cp04274a), 2020-01-01
Supplement: d0cp04274a1.pdf [file d0cp04274a1.pdf]

## Electronic Supplementary Information

### Low-power STMAS – breaking through the limit of large quadrupolar interactions in high-resolution solid-state NMR spectroscopy

Ivan Hung\* and Zhehong Gan

National High Magnetic Field Laboratory, 1800 East Paul Dirac Drive, Tallahassee, FL 32310, USA  
E-mail address: hung@magnet.fsu.edu

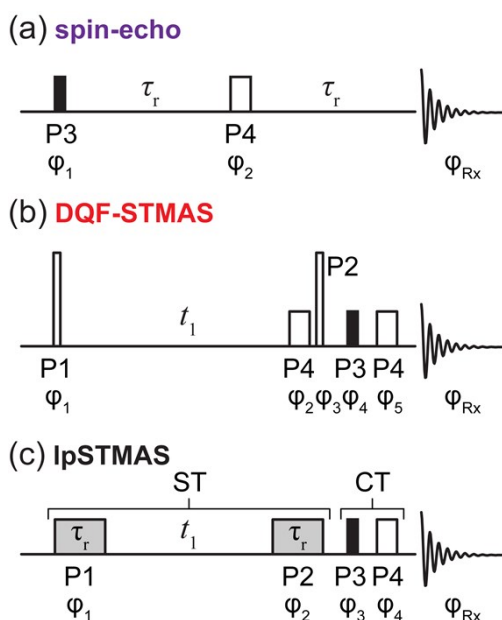

**Fig. S1.** Pulse sequences used for the (a) spin-echo, (b) DQF-STMAS, and (c) lpSTMAS experiments. All pulses are applied on-resonance with the CTs, except the P1 and P2 pulses for lpSTMAS which are applied at an offset far from the CT while still in the ST ssb manifold. Phase cycles: (a)  $\phi_1 = 0$ ,  $\phi_2 = 0123$ ,  $\phi_{Rx} = 0202$ ; (b)  $\phi_1 = \{0\}^*4 \{2\}^*4$ ,  $\phi_2 = \{0\}^*8 \{2\}^*8$ ,  $\phi_3 = 0123$ ,  $\phi_4 = 0$ ,  $\phi_5 = \{0\}^*16 \{1\}^*16 \{2\}^*16 \{3\}^*16$ ,  $\phi_{Rx} = 0202 \ 2020 \ 2020 \ 0202 \ 2020 \ 0202 \ 0202 \ 2020$ ; (c)  $\phi_1 = 02$ ,  $\phi_2 = 0$ ,  $\phi_3 = 0011 \ 2233$ ,  $\phi_4 = \{0\}^*8 \{1\}^*8 \{2\}^*8 \{3\}^*8$ ,  $\phi_{Rx} = 0231 \ 2013 \ 2013 \ 0231$ , where the phase values correspond to multiples of  $90^\circ$ . Hypercomplex acquisition was performed using States-TPPI by changing (b)  $\phi_3$  by  $-45^\circ$  and (c)  $\phi_2$  by  $-90^\circ$ .

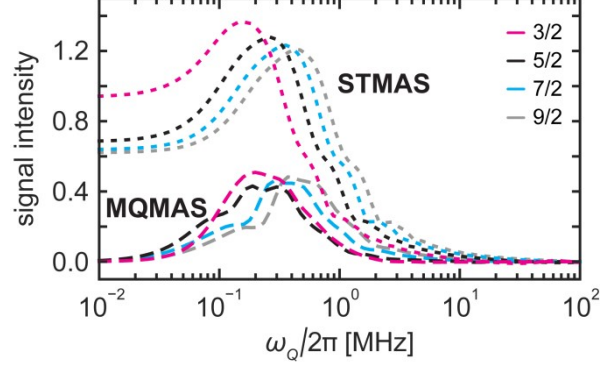

**Fig. S2.** Simulations of the maximum signal for the MQMAS, STMAS and IpSTMAS experiments as a function of  $\omega_Q = 2\pi \cdot \nu_Q = 3C_Q/[2S(2S+1)]$  for different spin-quantum numbers  $S = 3/2$  (magenta),  $5/2$  (black),  $7/2$  (cyan), and  $9/2$  (gray). A three-pulse z-filter sequence (P1 -  $t_1$  - P2 - ZF - P3 - acq) was used for all simulations with  $t_1 = (1/\nu_r) - (P1/2) - (P2/2)$ , where the  $|+3/2\rangle \leftrightarrow |-3/2\rangle$  triple-quantum (3Q) transition was selected during  $t_1$  for MQMAS, and the innermost  $|\pm 3/2\rangle \leftrightarrow |\pm 1/2\rangle$  satellite-transitions (STs) were selected during  $t_1$  for STMAS. The signal intensity is normalized to the simulated signal of a CT-selective one-pulse direct-excitation spectrum. Simulations were performed using SIMPSON<sup>1</sup> with an asymmetry parameter  $\eta_Q = 0$ , a MAS frequency of  $\nu_r = 16$  kHz, the zcw986 set of crystallite angles, and only the effects of first-order quadrupolar coupling. The pulse sequence parameters for MQMAS were P1 = 6.7  $\mu$ s, P2 = 1.5  $\mu$ s, and a *rf* field of  $\nu_1 = 100$  kHz; and for STMAS P1 = 2.5  $\mu$ s, P2 = 2.5  $\mu$ s, and  $\nu_1 = 100$  kHz. A pulse P3 =  $0.25/[\nu_1(S+1/2)]$  was used in all instances with  $\nu_1 = 10$  kHz.

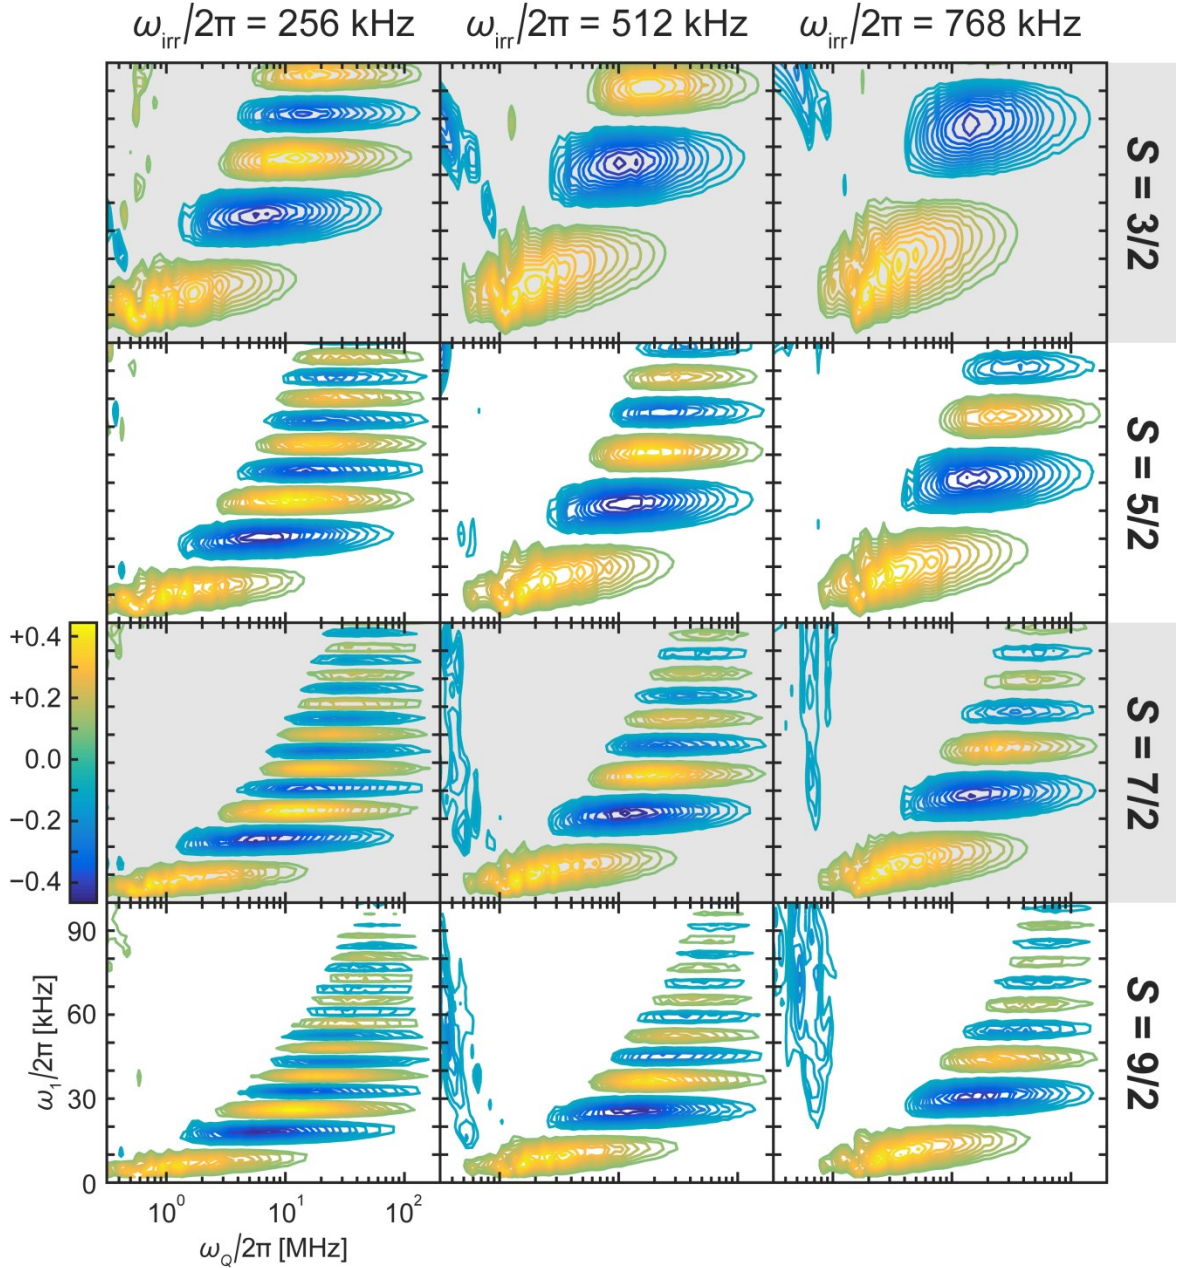

**Fig. S3.** Simulated IpSTMAS signal intensity for  $S = 3/2, 5/2, 7/2,$  and  $9/2$  at  $\omega_r/2\pi = 16$  kHz as a function of  $\omega_1$  and  $\omega_Q$ , normalized to CT-selective one-pulse direct-excitation spectra. The innermost  $|\pm 3/2\rangle \leftrightarrow |\pm 1/2\rangle$  satellite-transitions were selected during  $t_1$  in all instances. The P1 and P2 pulses were applied at offsets  $\omega_{irr}/2\pi$  of +256, +512, and +768 kHz, while P3 was applied on-resonance with the central-transition. The oscillations between positive and negative intensity along the vertical dimension represent nutation of the ST magnetization around the  $rf$  field  $\omega_1$  at the fixed  $P1 = P2 = 62.5$   $\mu$ s.

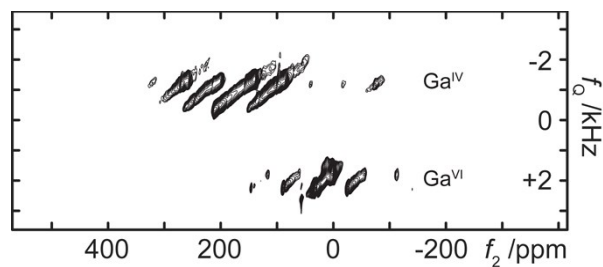

**Fig. S4.** Experimental 2D  $^{71}\text{Ga}$  lpSTMAS spectrum of  $\beta\text{-Ga}_2\text{O}_3$  after  $Q$ -shearing. The base contour level is set at 2% of the maximum intensity.

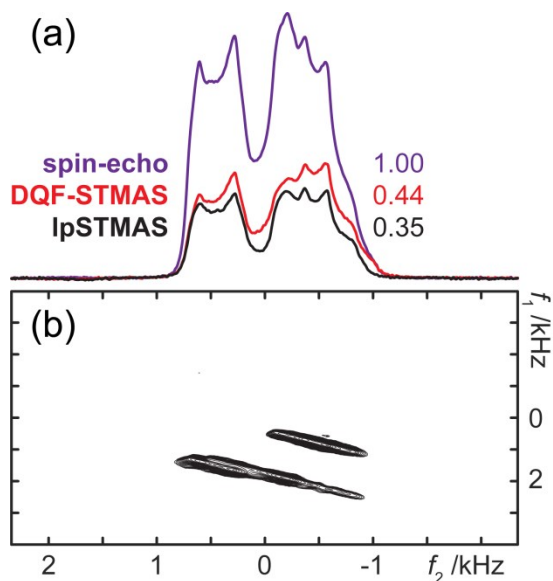

**Fig. S5.** (a) Experimental comparison of the  $^{87}\text{Rb}$  DQF-STMAS and lpSTMAS signal intensity of  $\text{RbNO}_3$  with a spin-echo. Spectra were recorded at  $B_0 = 14.1$  T,  $\nu_r = 16$  kHz with a recycle delay of 0.5 s and 32 averaged transients. The spin-echo spectrum was acquired with  $P3 = 20$   $\mu\text{s}$  and  $P4 = 40$   $\mu\text{s}$  at  $\nu_1 = 6.25$  kHz. The DQF-STMAS spectrum was acquired with  $t_1 = (1/\nu_r) - (P1/2) - (P2/2) - P4$ ,  $P1 = P2 = 1.9$   $\mu\text{s}$  at  $\nu_1 \sim 80$  kHz, and  $P3 = 20$   $\mu\text{s}$  and  $P4 = 40$   $\mu\text{s}$  at  $\nu_1 = 6.25$  kHz. The lpSTMAS spectrum was acquired with  $t_1 = (1/\nu_r) - (P1/2) - (P2/2) = 0$ ,  $P1 = P2 = (1/\nu_r) = 62.5$   $\mu\text{s}$  at  $\nu_1 = 12$  kHz, and  $P3 = 20$   $\mu\text{s}$  at  $\nu_1 = 6.25$  kHz. All pulses were applied on-resonance with the central-transitions, except the  $P1$  and  $P2$  pulses for lpSTMAS which were applied at an offset of  $\nu_{\text{irr}} = +384$  kHz, as optimized empirically for maximum overall signal. (b) 2D  $^{87}\text{Rb}$  lpSTMAS spectrum of  $\text{RbNO}_3$  showing a negligible CT-CT autocorrelation ridge. The base contour level is set at 5% of the maximum intensity.

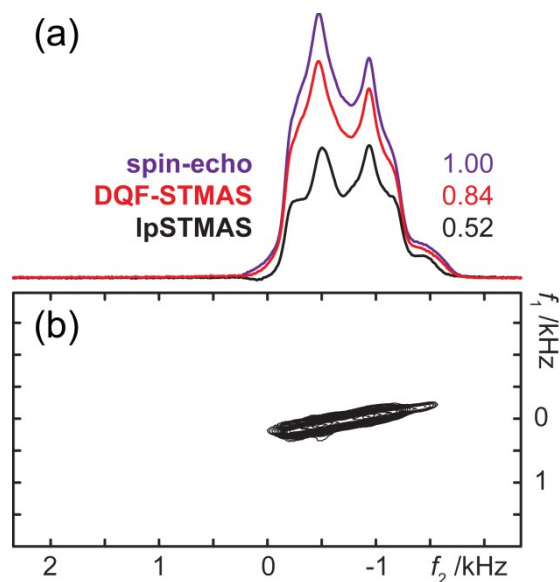

**Fig. S6.** (a) Experimental comparison of the  $^{27}\text{Al}$  DQF-STMAS and lpSTMAS signal intensity of  $\text{AlPO}_4$ -berlinite with a spin-echo. Spectra were recorded at  $B_0 = 14.1$  T,  $\nu_r = 16$  kHz with a recycle delay of 30 s and 16 averaged transients. The spin-echo spectrum was acquired with  $P_3 = 20$   $\mu\text{s}$  and  $P_4 = 40$   $\mu\text{s}$  at  $\nu_1 = 4.2$  kHz. The DQF-STMAS spectrum was acquired with  $t_1 = (1/\nu_r) - (P_1/2) - (P_2/2) - P_4$ ,  $P_1 = 1.0$   $\mu\text{s}$  and  $P_2 = 1.25$   $\mu\text{s}$  at  $\nu_1 = 71$  kHz, and  $P_3 = 20$   $\mu\text{s}$  and  $P_4 = 40$   $\mu\text{s}$  at  $\nu_1 = 4.2$  kHz. The lpSTMAS spectrum was acquired with  $t_1 = (1/\nu_r) - (P_1/2) - (P_2/2) = 0$ ,  $P_1 = P_2 = (1/\nu_r) = 62.5$   $\mu\text{s}$  at  $\nu_1 = 5.5$  kHz, and  $P_3 = 20$   $\mu\text{s}$  at  $\nu_1 = 4.2$  kHz. All pulses were applied on-resonance with the central-transition, except the  $P_1$  and  $P_2$  pulses for lpSTMAS which were applied at an offset of  $\nu_{\text{irr}} = +192$  kHz, as optimized empirically for maximum overall signal. (b) 2D  $^{27}\text{Al}$  lpSTMAS spectrum of  $\text{AlPO}_4$ -berlinite showing a negligible CT-CT autocorrelation ridge. The base contour level is set at 5% of the maximum intensity.
